# Supplementary material for: Hollow sp2-conjugated covalent organic framework encapsulating thiophene-based photosensitizer for enhanced visible-light-driven hydrogen evolution
Source: Royal Society of Chemistry journal article supplement (doi:10.1039/d3ta06192b), 2023-01-01
Supplement: d3ta06192b1.pdf [file d3ta06192b1.pdf]

## Supporting information

# **Hollow sp<sup>2</sup>-conjugated covalent organic framework encapsulating thiophene-based photosensitizer for enhanced visible-light-driven hydrogen evolution**

Chen Yang, Huawei Hu, Cheng Qian, Yaozu Liao\*

State Key Laboratory for Modification of Chemical Fibers and Polymer Materials, College of Materials Science and Engineering, Donghua University, Shanghai 201620, China

\*Corresponding Author: [yzliao@dhu.edu.cn](mailto:yzliao@dhu.edu.cn)

## **Table of contents**

### **S1. Experimental Methods**

*S1.1. Synthesis of pristine COF (g-C<sub>18</sub>N<sub>3</sub>-COF)*

*S1.2. Synthesis of g<sub>2</sub>T-T*

### **S2. Characterization and measurements**

*S2.1. Electrochemical measurements*

*S2.2. Photocatalytic hydrogen evolution measurements*

*S2.3. Apparent quantum efficiency (AQE) measurements*

### **S3. Supplementary Figures and tables**

*S3.1. Figures*

*S3.2. Tables*

### **S4. Supplementary references**

## S1 Experimental Methods

### S1.1. Synthesis of pristine COF (g-C<sub>18</sub>N<sub>3</sub>-COF)

The synthesis procedure of original COF (g-C<sub>18</sub>N<sub>3</sub>-COF) followed the literature with minor modification (**Scheme S1**).<sup>[1]</sup> A 25 mL pyrex tube was charged with TMTA (61.58 mg, 0.50 mmol), DFB (100.60 mg, 0.75 mmol), KOH (84.15 mg, 1.5 mmol), *n*BuOH (7 mL) and *o*DCB (3 mL), then degassed through with three freeze-pump-thaw cycles (liquid nitrogen bath), sealed under vacuum and sonicated for 5 min. Subsequently, the resulting pale-yellow solution was heated at 120 °C for a 3-day reaction. After cooling to room temperature, the precipitate was collected and washed with methanol, tetrahydrofuran, acetone and dichloromethane in sequence for two times, and then dried under vacuum at 120 °C for 12 h. Finally, pure COF sample was afforded as yellow powder (yield: 88%, relative to the used amount of monomer).

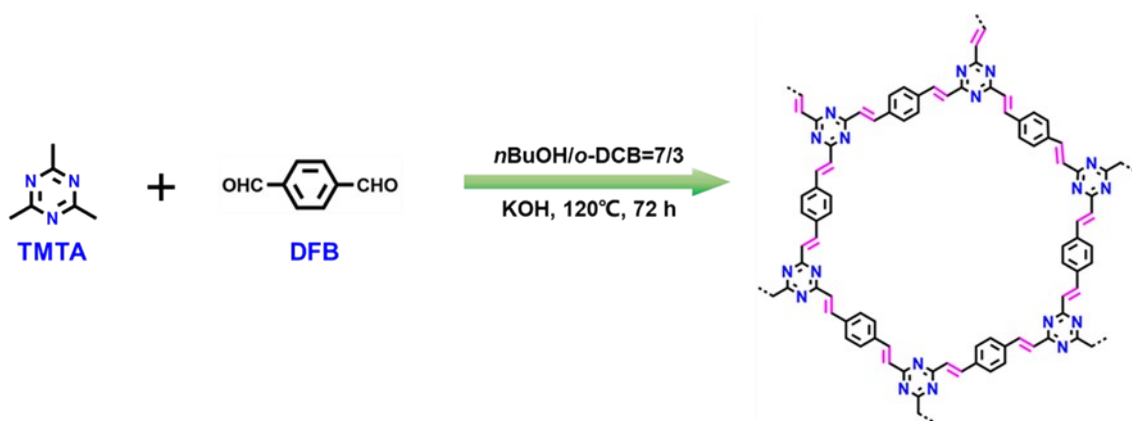

**Scheme S1** Synthetic routes for preparing pristine COF via Knoevenagel condensation reaction.

### S1.2. Synthesis of g<sub>2</sub>T-T

g<sub>2</sub>T-T was synthesized according to the reported method. Briefly, the polymerization of g<sub>2</sub>T-T was carried out according to the previously reported method, using a Biotage Initiator+ microwave reactor.<sup>[2]</sup> Specifically, in a dried 5.0 mL microwave vial, 63.8 mg of (3,3'-bisalkoxy(TEG)-[2,2'-bithiophene]-5,5'-diyl)bis(trimethylstannane) (155.7 μmol) and 100.0 mg of 5,5'-dibromo-3,3'-bisalkoxy(TEG)-2,2'-bithiophene (155.7 μmol) were dissolved in 2.0 mL of anhydrous, degassed DMF. Pd<sub>2</sub>(dba)<sub>3</sub> (2.48 mg, 2.71 μmol) and P(*o*-tol)<sub>3</sub> (3.76 mg, 12.3 μmol) were added and the vial was sealed under nitrogen. The vial was heated under 100°C for 24 hours. After polymerization, the vial was cooled, 40 μL of 2-(trimethylstannyl)-thiophene was added and the contents were subjected to microwave heating: 2 min 100°C, 2 min 140°C, 2 min 160°C, 2 min 180°C, 5 min 200°C. Finally, 100 μL 2-bromothiophene was added and the reaction was subjected to microwave heating: 2 min 100°C, 2 min 140°C, 2 min 160°C, 2 min 180°C, 5 min 200°C. Then, the reaction mixture was cooled to room temperature and precipitated in methanol. A blue solid was formed, which was filtered into a glass fiberthimble and Soxhlet extraction was carried out with hexane, methanol, ethyl acetate, acetone, and chloroform for 12 h at each step. The polymer dissolved in hot chloroform. Finally, the polymer chloroform solution was concentrated and dried under a high vacuum. A blue solid was obtained with a mass ~80 mg.

## S2. Characterization and measurements

The reactions involving inert atmosphere were carried out using standard Schlenk technique. The <sup>13</sup>C CP/MAS NMR spectra were taken at a Bruker Avance 400 (400 MHz) spectrometer. X-ray photoelectron spectroscopy (XPS) analyses were determined by a Thermo Escalab 250 Xi spectrometer. Powder X-ray diffraction patterns were recorded on a Bruker D8 Advance diffractometer with Cu-Kα1 radiation (λ = 1.5406 Å). FT-IR spectra were taken on a Thermo Scientific Nicolet iS5 spectrometer. Thermal gravimetric analyses (TGA) were performed on a Libra/209F1 TG-209 thermogravimetric analyzer in nitrogen atmosphere from ambient temperature to 800 °C at the rate of 10 °C min<sup>-1</sup>. Ultraviolet visible diffuse reflectance spectra (UV-vis DRS) were obtained by a UV-3600 diffuse reflectance spectroscopy. Particle size of all the materials were collected at ambient temperature on an Andon paar (Littersizer500) dynamic light scattering (DLS) analyzer. Steady-state photoluminescence (PL) emission spectra and PL decay spectra

were measured at room temperature using a QM/TM fluorometer with the excitation wavelength of 365 and 386 nm, respectively. Scanning electron microscope (SEM) images were obtained on a Hitachi SU8010 microscope. Transmission electron microscope (TEM) characterizations were conducted using a Talos F200S microscope with an accelerating voltage of 200 KV. Specific surface area, pore volume, and pore size distribution data were obtained on a Micro ASAP 2046 surface area and porosity analyzer.

### S2.1. Electrochemical measurements

Indium-tin oxide (ITO) glasses were firstly cleaned by sonication in ethanol for 30 min. 4 mg of samples power was mixed with 70  $\mu$ L 5% Nafion and 1 mL *n*BuOH and ultra-sonicated for 60 min to get slurry. 120  $\mu$ L of the slurry was spreading onto ITO glass and natural drying in air. A conventional three electrodes cell was used with a platinum mesh as the counter electrode and an Ag/AgCl electrode (saturated KCl) as reference electrode. The electrolyte was a 0.2 M Na<sub>2</sub>SO<sub>4</sub> aqueous solution (pH=6.8) and was purged with nitrogen gas for 1 h prior to the measurements. The working electrodes were immersed in the electrolyte for 60 s before any measurements were taken. The photocurrent measurements were conducted with a GAMRY workstation, with the working electrodes irradiated from the front side. The visible light was generated by a 300 W xenon lamp (PerfectLight, PLS-SXE300/300UV) with a 400 nm cut-off filter, and was chopped manually. For Mott-Schottky experiments, the perturbation signal was 5 mV with the frequency of 1000, 2000 and 3000 Hz. The electrochemical impedance measurements were performed in dark at open-circuit voltage with AC amplitude of 5 mV in the frequencies range of 0.01 Hz to 10<sup>5</sup> Hz.<sup>[3]</sup> The applied potentials vs. Ag/AgCl are converted to RHE potentials using the following equation:  $E_{RHE} = E_{Ag/AgCl} + 0.0591\text{pH} + E^{\theta}_{Ag/AgCl}$  ( $E^{\theta}_{Ag/AgCl} = 0.199$  V).

### S2.2. Photocatalytic hydrogen evolution measurements

Typically, 10 mg photocatalysts were loaded with 3.0 wt% Pt dispersed (chloroplatinic acid hexahydrate as precursor) into a 50 mL 1M aqueous ascorbic acid solution via ultrasonic treatment for 15 min under sealed environment. After that, the mixture was transferred into the closed gas circulation system (Perfect Light Company Labsolar-6A). The temperature of the reaction solution was maintained at 5 °C by the flow of cooling water. Prior to the photocatalytic test, the system was purged with Ar flow to remove air. A 300 W Xe lamp (Perfect Light PLS-SXE 300, 57 mW cm<sup>-1</sup>) was used as the light source. The wavelength of the incident light was controlled by using a 400 nm long pass cut-off filter. The amount of H<sub>2</sub> evolved was determined using gas chromatography (SHIMADZU GC-2014, thermal conductivity detector (TCD), Ar carrier, Agilent). Hydrogen dissolved in the reaction mixture was not measured and the pressure increase generated by the evolved hydrogen was neglected in the calculations.

### S2.3. Apparent quantum efficiency (AQE) measurements.

AQE measurements for hydrogen evolution were performed under the illumination of a 300 W Xe lamp with 410 nm band pass filters ( $\lambda_0 \pm 20$  nm) for 4 hours. An optical diode power meter (FZ-A spectroradiometer) was used to measure its photon flux with an intensity of 3.5 mW cm<sup>-1</sup>. For these tests, 30 mg of photocatalyst was used. The apparent quantum efficiency was calculated using the following formula:

$$AQE = \frac{N_e}{N_p} \times 100\% = \frac{2 \times M \times N_A}{\frac{E_{total}}{E_{photon}}} \times 100\% = \frac{2 \times M \times N_A}{\frac{S \times p \times t}{h \times \frac{c}{\lambda}}} \times 100\% = \frac{2 \times M \times N_A \times h \times c}{S \times P \times t \times \lambda} \times 100\%$$

where  $N_e$  is the amount of generated electrons,  $N_p$  is the incident photons,  $M$  is the amount of Hydrogen molecules (mol),  $N_A$  is Avogadro constant ( $6.022 \times 10^{23}$  mol<sup>-1</sup>),  $h$  is the Planck constant ( $6.626 \times 10^{-34}$  J·s),  $c$  is the speed of light ( $3 \times 10^8$  m s<sup>-1</sup>),  $S$  is the irradiation area (cm<sup>2</sup>),  $P$  is the intensity of irradiation light (W cm<sup>-2</sup>),  $t$  is the photoreaction time (s),  $\lambda$  is the wavelength of the monochromatic light (m).

### S3. Supplementary Figures and tables

#### S3.1. Figures

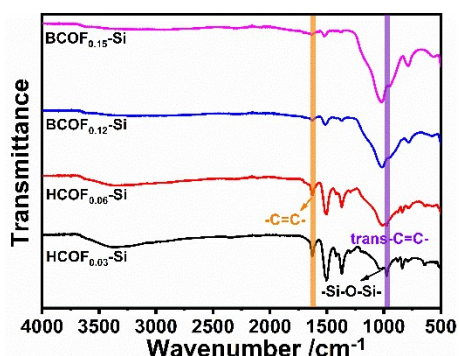

Fig. S1 FT-IR spectra of HCOF<sub>0.03</sub>-Si, HCOF<sub>0.06</sub>-Si, BCOF<sub>0.12</sub>-Si, BCOF<sub>0.15</sub>-Si.

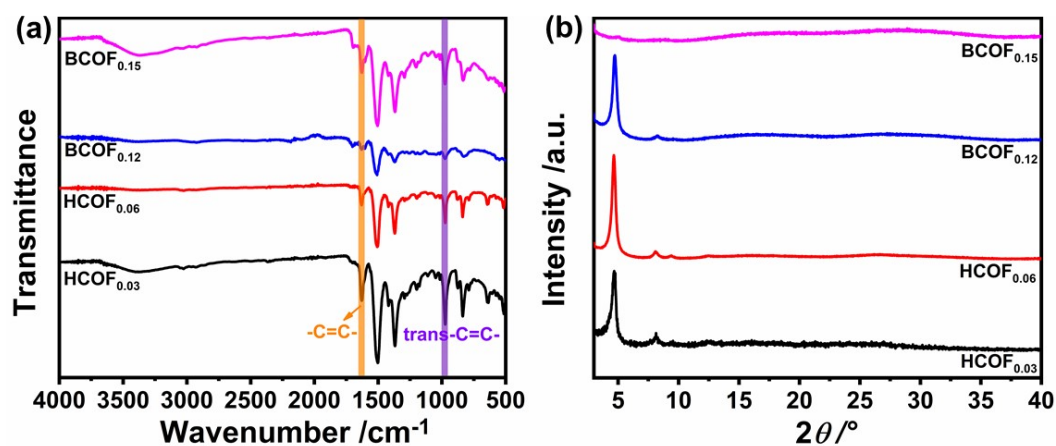

Fig. S2 (a) FT-IR spectra and (b) powder XRD patterns of HCOF<sub>0.03</sub>, HCOF<sub>0.06</sub>, BCOF<sub>0.12</sub> and BCOF<sub>0.15</sub>.

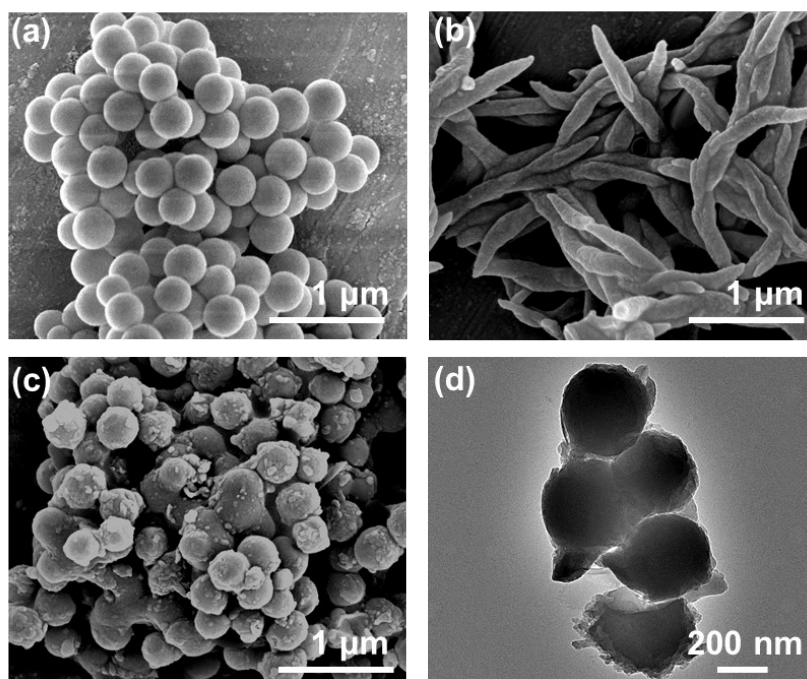

Fig. S3 SEM images of (a) NH<sub>2</sub>-SiO<sub>2</sub>, (b) pristine COF, (c) HCOF<sub>0.09</sub>-Si, (d) TEM image of HCOF<sub>0.09</sub>-Si.

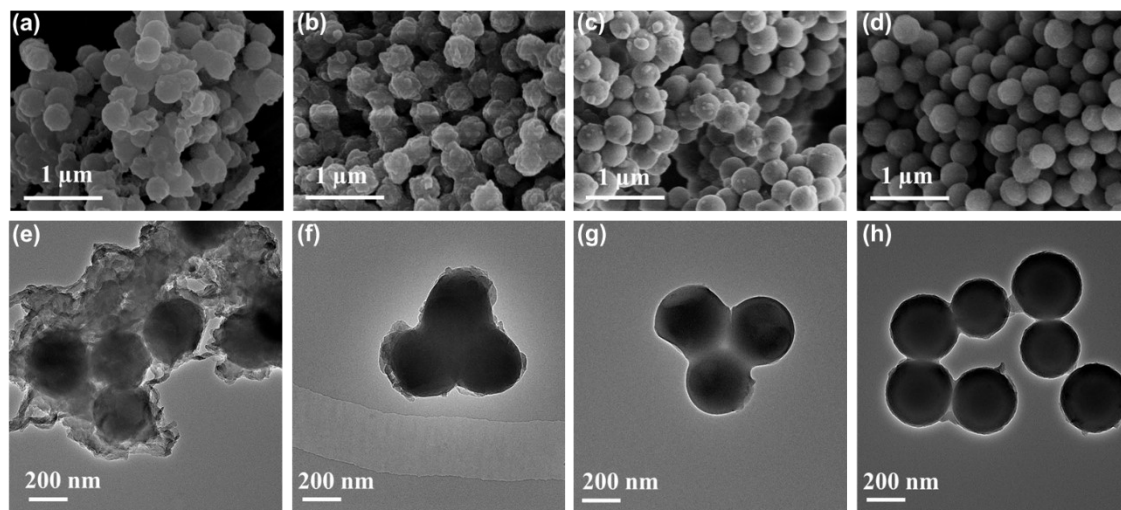

**Fig. S4** SEM and TEM images of (a,e)  $\text{HCOF}_{0.03}\text{-Si}$ , (b,f)  $\text{HCOF}_{0.06}\text{-Si}$ , (c,g)  $\text{BCOF}_{0.12}\text{-Si}$ , (d,h)  $\text{BCOF}_{0.15}\text{-Si}$ .

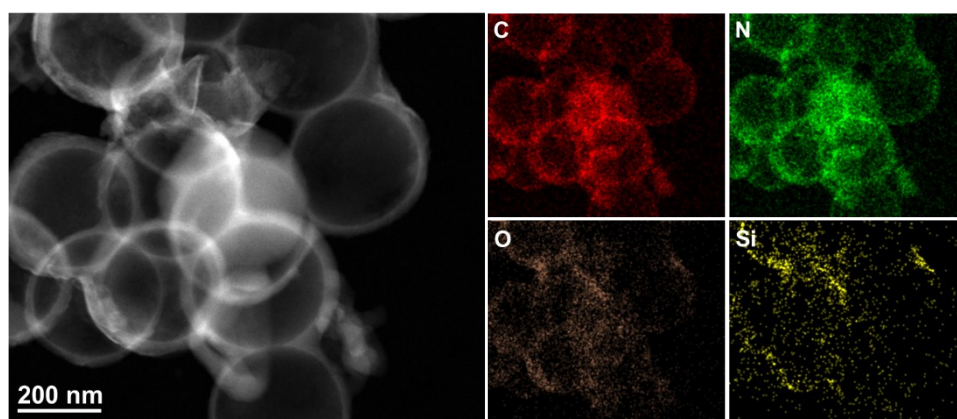

**Fig. S5** TEM images and elements mapping of  $\text{HCOF}_{0.09}$  with additional 24 h washing.

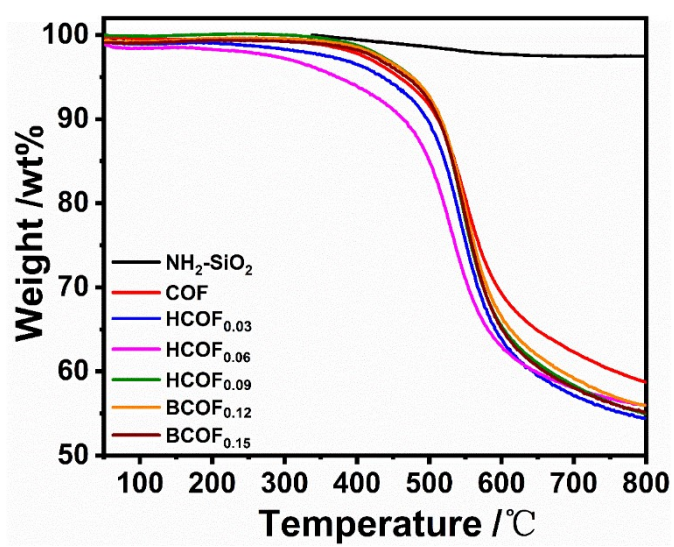

**Fig. S6** TGA profiles of  $\text{NH}_2\text{-SiO}_2$ , pristine COF,  $\text{HCOF}_{x1}$  and  $\text{BCOF}_{x2}$ .

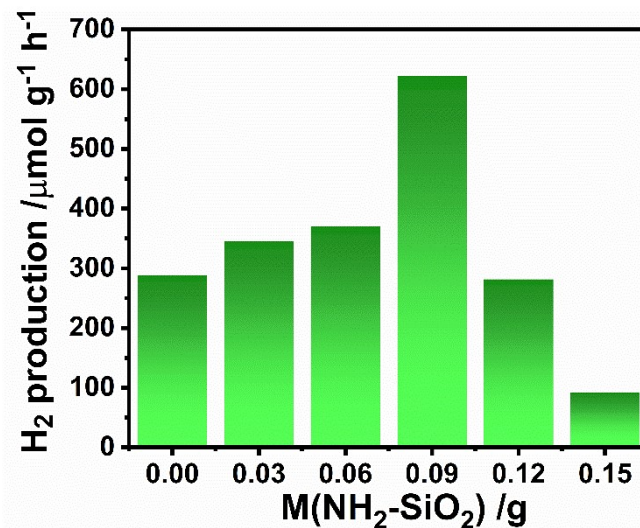

**Fig. S7** H<sub>2</sub> evolution rate from water splitting with increasing amount of NH<sub>2</sub>-SiO<sub>2</sub>.

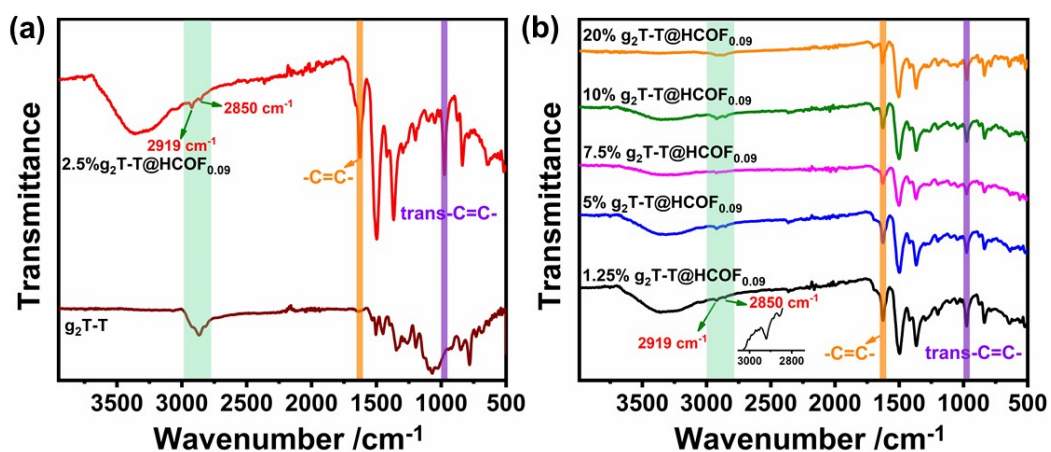

**Fig. S8** FT-IR spectra of (a) g<sub>2</sub>T-T and 2.5% g<sub>2</sub>T-T@HCOF<sub>0.09</sub>, (b) 1.25% g<sub>2</sub>T-T@HCOF<sub>0.09</sub>, 5% g<sub>2</sub>T-T@HCOF<sub>0.09</sub>, 7.5% g<sub>2</sub>T-T@HCOF<sub>0.09</sub>, 10% g<sub>2</sub>T-T@HCOF<sub>0.09</sub>, 20% g<sub>2</sub>T-T@HCOF<sub>0.09</sub>.

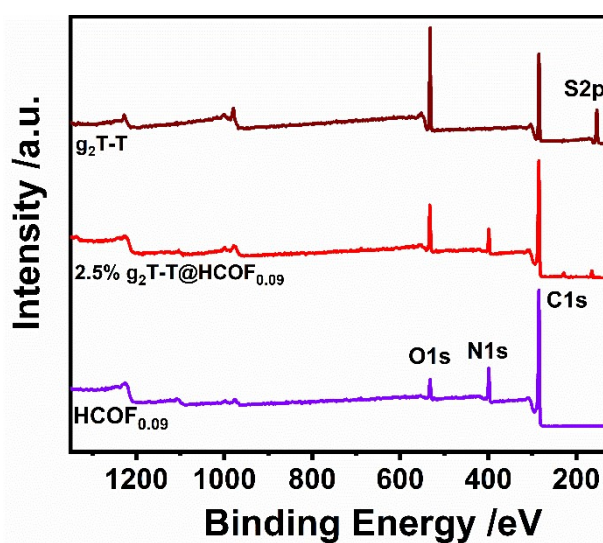

**Fig. S9** Full survey XPS spectra of HCOF<sub>0.09</sub>, 2.5% g<sub>2</sub>T-T@HCOF<sub>0.09</sub> and g<sub>2</sub>T-T.

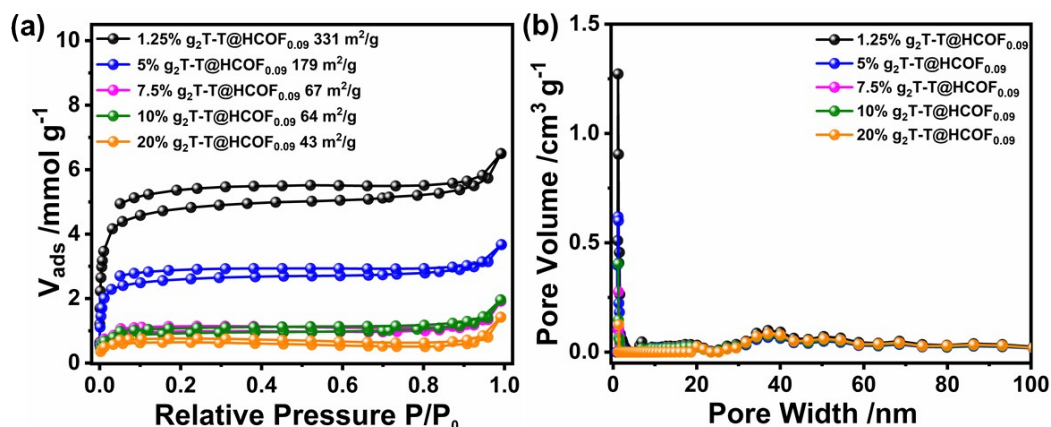

**Fig. S10** (a)  $N_2$  adsorption/desorption isotherms and (b) corresponding DFT pore size distributions of 1.25% g<sub>2</sub>T-T@HCOF<sub>0.09</sub>, 5% g<sub>2</sub>T-T@HCOF<sub>0.09</sub>, 7.5% g<sub>2</sub>T-T@HCOF<sub>0.09</sub>, 10% g<sub>2</sub>T-T@HCOF<sub>0.09</sub>, 20% g<sub>2</sub>T-T@HCOF<sub>0.09</sub>.

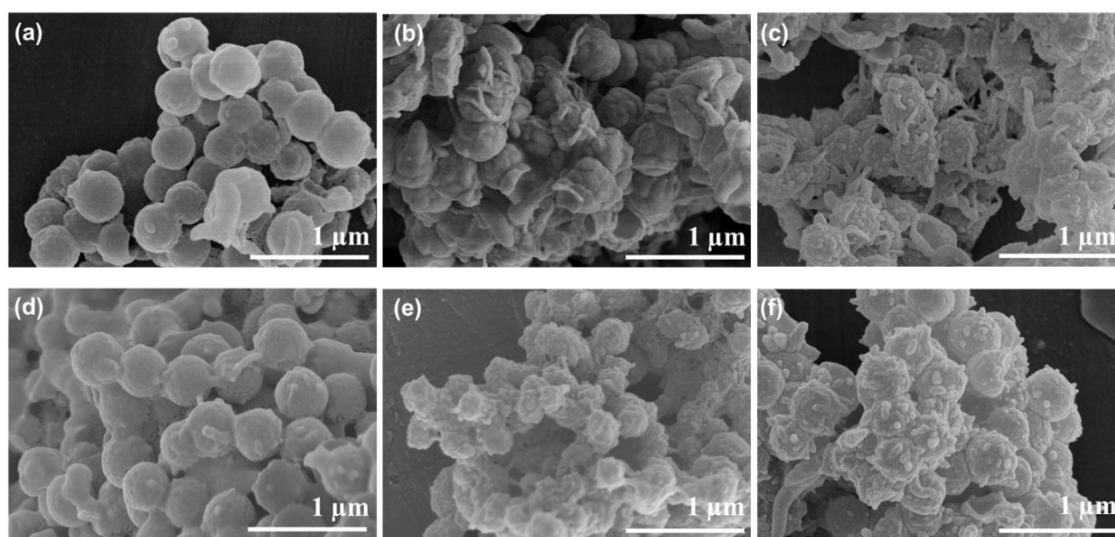

**Fig. S11** SEM images of (a) 1.25% g<sub>2</sub>T-T@HCOF<sub>0.09</sub>, (b) 2.5% g<sub>2</sub>T-T@HCOF<sub>0.09</sub>, (c) 5% g<sub>2</sub>T-T@HCOF<sub>0.09</sub>, (d) 7.5% g<sub>2</sub>T-T@HCOF<sub>0.09</sub>, (e) 10% g<sub>2</sub>T-T@HCOF<sub>0.09</sub>, (f) 20% g<sub>2</sub>T-T@HCOF<sub>0.09</sub>.

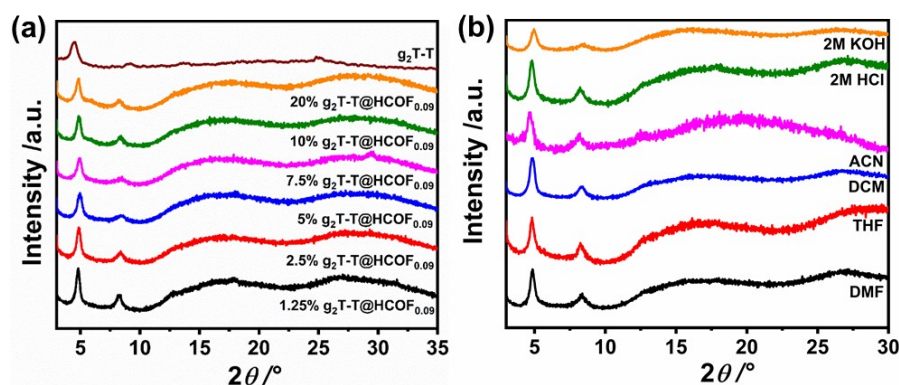

**Fig. S12** PXRD patterns of (a) g<sub>2</sub>T-T and y% g<sub>2</sub>T-T@HCOF<sub>0.09</sub>, (b) 2.5% g<sub>2</sub>T-T@HCOF<sub>0.09</sub> immersed in different organic solvents, acid and base solutions for 72 h.

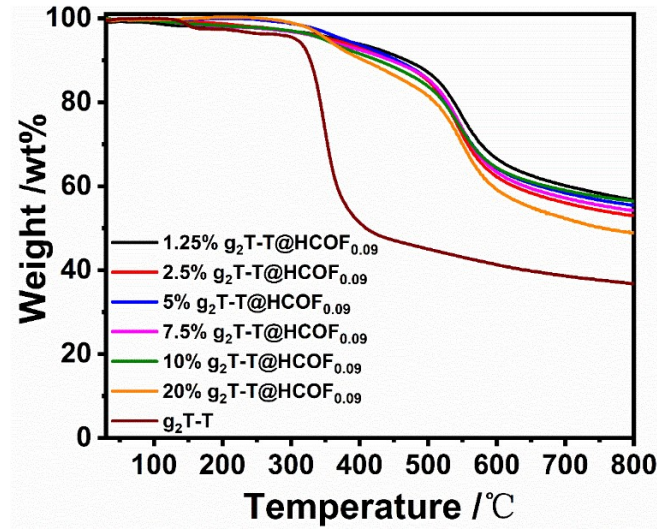

Fig. S13 TGA profiles of  $y\%$   $\text{g}_2\text{T-T@HCOF}_{0.09}$  and  $\text{g}_2\text{T-T}$ .

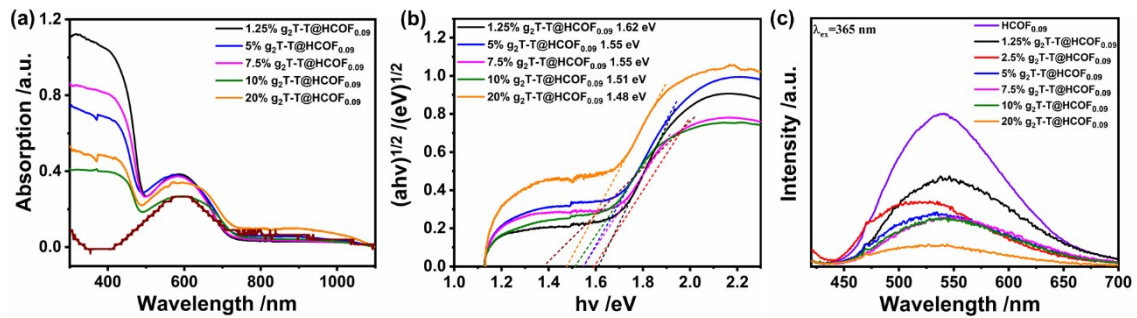

Fig. S14 (a) UV-vis DRS, (b) Tauc plots of  $y\%$   $\text{g}_2\text{T-T@HCOF}_{0.09}$ ; (c) PL emission spectra ( $\lambda_{\text{ex}}=365$  nm) of  $\text{HCOF}_{0.09}$ ,  $y\%$   $\text{g}_2\text{T-T@HCOF}_{0.09}$ .

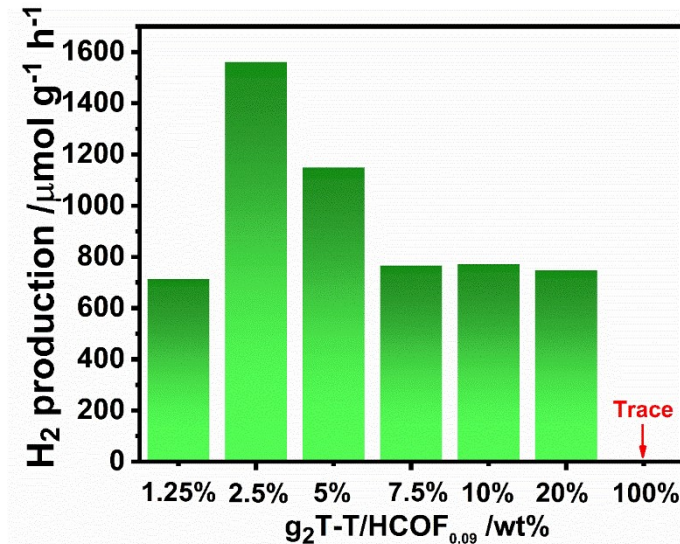

Fig. S15  $\text{H}_2$  evolution rate under visible-light irradiation with increasing amount of  $\text{g}_2\text{T-T}$ .



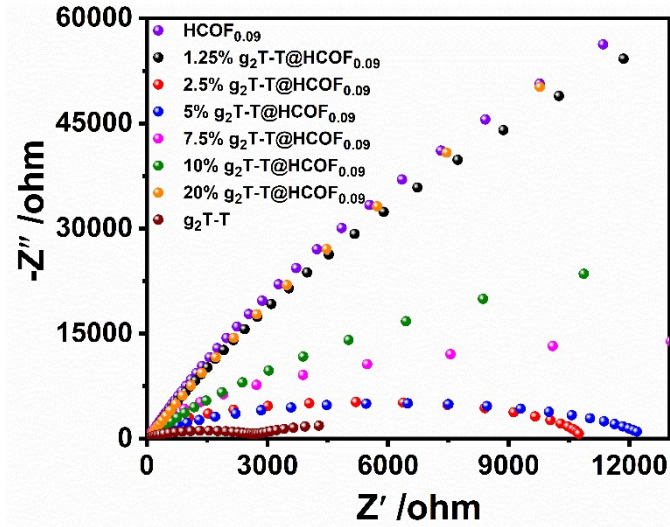

Fig. S16 Nyquist plots of  $\text{HCOF}_{0.09}$ ,  $y\%$   $\text{g}_2\text{T-T@HCOF}_{0.09}$ , and  $\text{g}_2\text{T-T}$ .

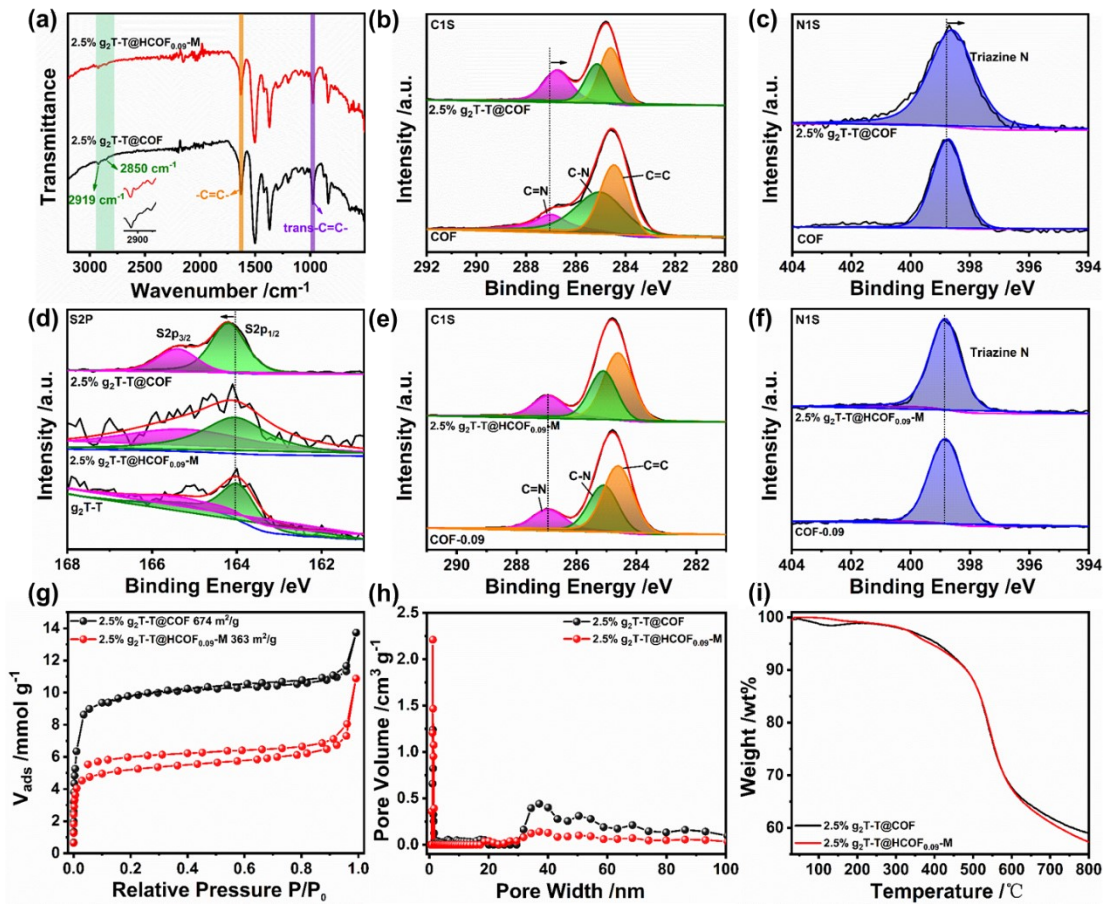

Fig. S17 (a) FT-IR spectra, (b,e) C1s core-level XPS spectra, (c,f) N1s core-level XPS spectra, (d) S2p core-level XPS spectra, (g)  $\text{N}_2$  adsorption/ desorption isotherms, (h) corresponding DFT pore size distributions, (i) TGA profiles of pristine COF, 2.5%  $\text{g}_2\text{T-T@COF}$  and 2.5%  $\text{g}_2\text{T-T@HCOF}_{0.09}\text{-M}$ .

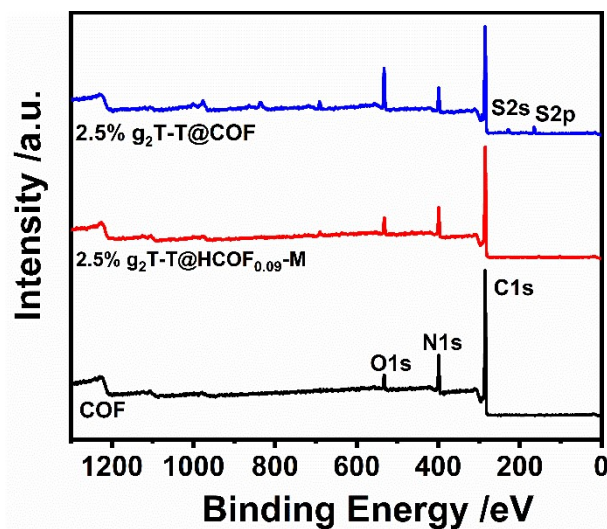

**Fig. S18** Full survey XPS spectra of pristine COF, 2.5%  $g_2T-T@HCOF_{0.09-M}$ , and 2.5%  $g_2T-T@COF$ .

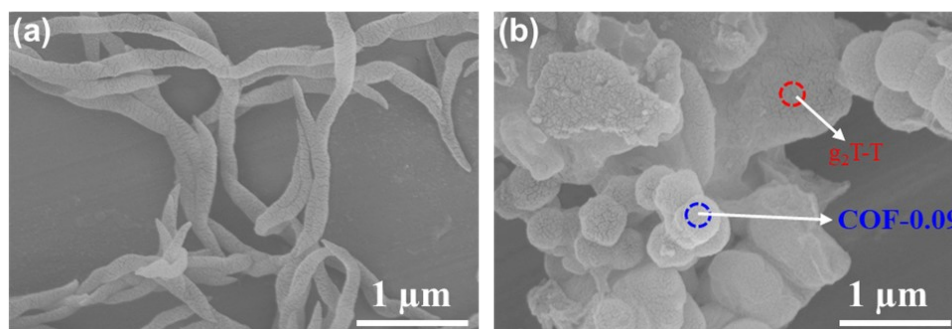

**Fig. S19** SEM images of (a) 2.5%  $g_2T-T@COF$ , (b) 2.5%  $g_2T-T@HCOF_{0.09-M}$ .

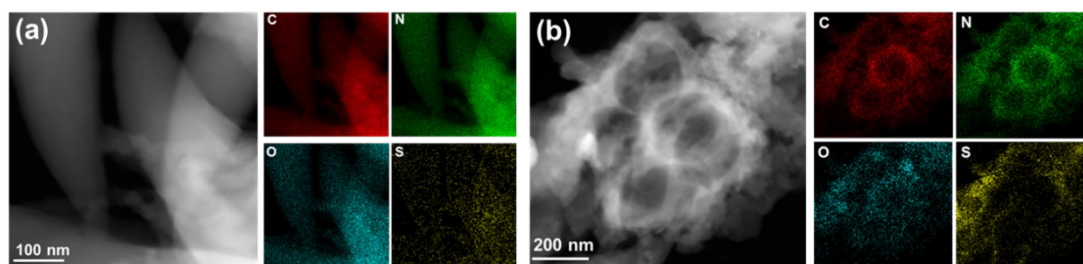

**Fig. S20** TEM images and elements mapping of (a) 2.5%  $g_2T-T@COF$ , (b) 2.5%  $g_2T-T@HCOF_{0.09-M}$ .

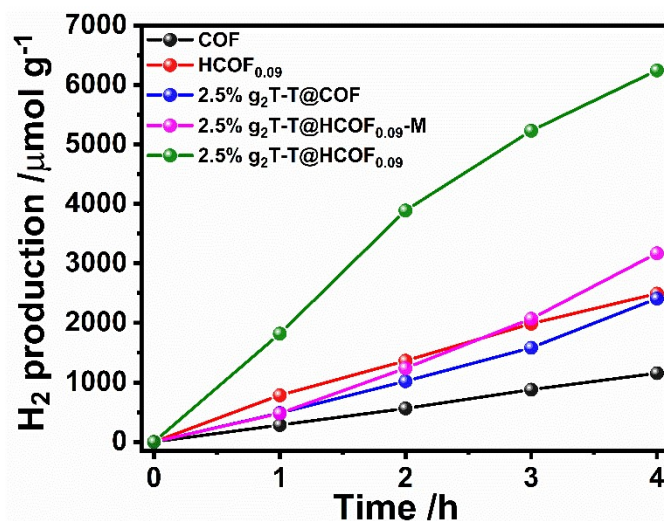

**Fig. S21** Time courses of H<sub>2</sub> production of pristine COF, HCOF<sub>0.09</sub>, 2.5% g<sub>2</sub>T-T@COF, 2.5% g<sub>2</sub>T-T@HCOF<sub>0.09</sub>-M and 2.5% g<sub>2</sub>T-T@HCOF<sub>0.09</sub>.

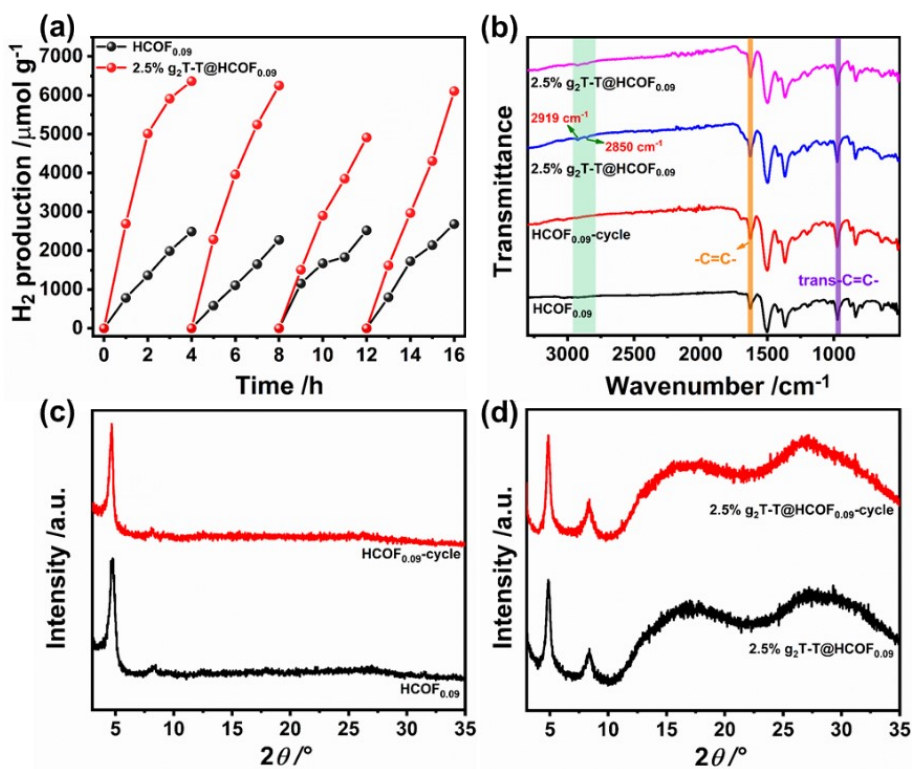

**Fig. S22** Long-term photocatalytic tests: (a) H<sub>2</sub> generation behavior over time, (b) FT-IR spectra, (c,d) PXRD pattern.

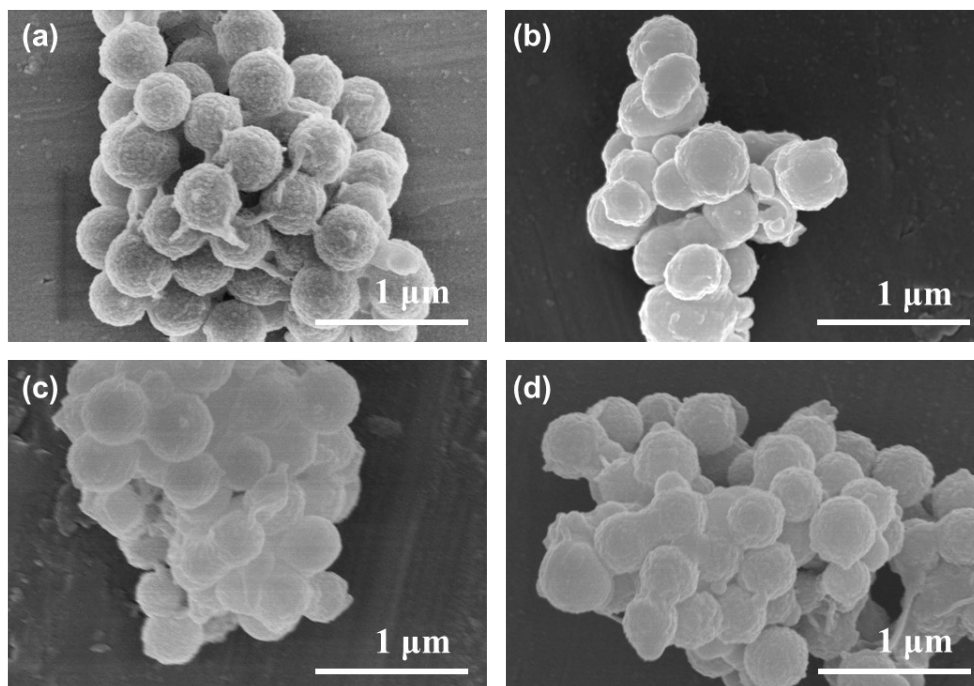

**Fig. S23** SEM images of (a,c) HCOF<sub>0.09</sub> and 2.5% g<sub>2</sub>T-T@HCOF<sub>0.09</sub>; (b,d) HCOF<sub>0.09</sub> and 2.5% g<sub>2</sub>T-T@HCOF<sub>0.09</sub> upon 16 hours cycling.

### S3.2. Tables

**Table S1** TEM elements analysis table of HCOF<sub>0.09</sub>

| <b>Element</b> | <b>Atomic Fraction (%)</b> | <b>Atomic Error (%)</b> | <b>Mass Fraction (%)</b> | <b>Mass Error (%)</b> | <b>Fit error (%)</b> |
|----------------|----------------------------|-------------------------|--------------------------|-----------------------|----------------------|
| C              | 89.07                      | 6.39                    | 86.22                    | 4.39                  | 3.62                 |
| N              | 6.85                       | 1.44                    | 7.57                     | 1.54                  | 1.25                 |
| O              | 3.08                       | 0.65                    | 4.04                     | 0.82                  | 2.01                 |
| Si             | 1.01                       | 0.21                    | 2.17                     | 0.43                  | 1.46                 |

**Table S2** TEM elements analysis table of HCOF<sub>0.09</sub> with additional 24 h washing

| <b>Element</b> | <b>Atomic Fraction (%)</b> | <b>Atomic Error (%)</b> | <b>Mass Fraction (%)</b> | <b>Mass Error (%)</b> | <b>Fit error (%)</b> |
|----------------|----------------------------|-------------------------|--------------------------|-----------------------|----------------------|
| C              | 86.87                      | 4.38                    | 83.38                    | 2.86                  | 2.09                 |
| N              | 6.45                       | 1.34                    | 7.07                     | 1.44                  | 3.05                 |
| O              | 5.63                       | 1.16                    | 7.33                     | 1.48                  | 1.47                 |
| Si             | 1.05                       | 0.21                    | 2.22                     | 0.43                  | 2.04                 |

**Table S3** Summary of properties and H<sub>2</sub> evolution activity of vinylene-linked polymer-based visible-light photocatalytic systems

| COF                                   | Optical gap (eV) | Cocatalyst | H <sub>2</sub> evolution rate (μmol g <sup>-1</sup> h <sup>-1</sup> ) | References       |
|---------------------------------------|------------------|------------|-----------------------------------------------------------------------|------------------|
| 2.5% g <sub>2</sub> T-T@COF           | 1.59             | 3wt% Pt    | 1560                                                                  | <b>This work</b> |
| 60% COF- <i>o</i> OH                  | 2.30             | 3wt% Pt    | 1119                                                                  | [4]              |
| 60% COF- <i>m</i> OH                  | 2.30             | 3wt% Pt    | 527                                                                   |                  |
| 60% COF- <i>p</i> OH                  | 2.27             | 3wt% Pt    | 1302                                                                  |                  |
| COF-alkene                            | 3.87             | 3wt% Pt    | 2330                                                                  | [5]              |
| COF-imide                             | 3.70             | 3wt% Pt    | 34                                                                    |                  |
| COF-imine                             | 3.85             | 3wt% Pt    | 12                                                                    |                  |
| g-C <sub>18</sub> N <sub>3</sub> -COF | 2.42             | 3wt% Pt    | 292                                                                   | [1]              |
| g-C <sub>33</sub> N <sub>3</sub> -COF | 2.54             | 3wt% Pt    | 74                                                                    |                  |
| g-C <sub>40</sub> N <sub>3</sub> -COF | 2.36             | 3wt% Pt    | 2596                                                                  | [6]              |
| g-C <sub>31</sub> N <sub>3</sub> -COF | 2.40             | 3wt% Pt    | 542                                                                   |                  |
| g-C <sub>37</sub> N <sub>3</sub> -COF | 2.52             | 3wt% Pt    | 396                                                                   |                  |
| Sp <sup>2</sup> C-COF                 | 2.05             | 3wt% Pt    | 1360                                                                  | [7]              |
| Sp <sup>2</sup> C-COF <sub>ERDN</sub> | 2.00             | 3wt% Pt    | 2120                                                                  |                  |
| g-C <sub>52</sub> N <sub>6</sub> -COF | 2.15             | 3wt% Pt    | 1178                                                                  | [8]              |
| CPN-3                                 | 2.27             | 3wt% Pt    | 1508                                                                  | [9]              |
| COF-DFB                               | 2.3              | 3wt% Pt    | 2100                                                                  | [10]             |
| COF-BPDA                              | 2.1              | 3wt% Pt    | 3230                                                                  |                  |
| CBPP                                  | 2.22             | 25 mL      | 410                                                                   | [11]             |
| CBBP                                  | 2.20             | PVP-Pt     | 840                                                                   |                  |
| CFP                                   | 2.05             | colloid    | 5070                                                                  |                  |
| CBRP                                  | 2.15             |            | 470                                                                   |                  |
| v-2D-COF-NS1                          | 1.85             | 8wt% Pt    | 4400                                                                  | [12]             |
| v-2D-COF-NO1                          | 1.86             | 8wt% Pt    | 1970                                                                  | [13]             |
| v-2D-COF-NO2                          | 1.95             | 8wt% Pt    | 863                                                                   |                  |

**Table S4** The band positions of HCOF<sub>0.09</sub> and g<sub>2</sub>T-T

|                                              | <b>g<sub>2</sub>T-T</b> | <b>HCOF<sub>0.09</sub></b> |
|----------------------------------------------|-------------------------|----------------------------|
| E <sub>g</sub> (eV)                          | 1.37                    | 2.25                       |
| E <sub>fb</sub> (V vs. RHE )                 | 1.58                    | -1.02                      |
| E <sub>CB</sub> (eV vs. vacuum energy level) | -5.15                   | -3.72                      |
| E <sub>VB</sub> (eV vs. vacuum energy level) | -6.52                   | -5.97                      |

#### S4. Supplementary references

- (1) S. Wei, F. Zhang, W. Zhang, P. Qiang, K. Yu, X. Fu, D. Wu, S. Bi and F. Zhang, *J. Am. Chem. Soc.*, 2019, **141**, 14272-14279.
- (2) C. B. Nielsen, A. Giovannitti, D. T. Sbircea, E. Bandiello, M. R. Niazi, D. A. Hanifi, M. Sessolo, A. Amassian, G. G. Malliaras, J. Rivnay and I. McCulloch, *J. Am. Chem. Soc.*, 2016, **138**, 10252.
- (3) J. Xie, C. Wang, N. Chen, W. Chen, J. Xu, P. Bai, L. Zhang and H. Wang, *J. Mater. Chem. C.*, 2021, **9**, 4378.
- (4) C. Yang, C. Qian, M. Yu and Y. Liao, *Chem. Eng. J.*, 2023, **454**, 140341.
- (5) C. Mo, M. Yang, F. Sun, J. Jian, L. Zhong, Z. Fang, J. Feng and D. Yu, *Adv. Sci.*, 2020, **7**, 1902988.
- (6) S. Bi, C. Yang, W. Zhang, J. Xu, L. Liu, D. Wu, X. Wang, Y. Han, Q. Liang and F. Zhang, *Nat. Commun.*, 2019, **10**, 2467.
- (7) E. Jin, Z. Lan, Q. Jiang, K. Geng, G. Li, X. Wang and D. Jiang, *Chem*, 2019, **5**, 1632-1647.
- (8) J. Xu, C. Yang, S. Bi, W. Wang, Y. He, D. Wu, Q. Liang, X. Wang and F. Zhang, *Angew. Chem. Int. Ed.*, 2020, **59**, 23845-23853.
- (9) Y. He, W. Ma, N. Yang, F. Liu, Y. Chen, H. Liu and X. Zhu, *Chem. Commun.*, 2021, **5**, 7557-7560.
- (10) S. Bi, F. Meng, D. Wu and F. Zhang, *J. Am. Chem. Soc.*, 2022, **144**, 3653-3659.
- (11) S. Han, T. Huang, Y. Pan, J. Zhao, H. Lin, H. Lin, Z. Ding, H. Xi and J. Long, *Catal. Sci. Technol.*, 2021, **11**, 4021-4025.
- (12) S. Li, R. Ma, S. Xu, T. Zheng, H. Wang, G. Fu, H. Yang, Y. Hou, Z. Liao, B. Wu, X. Feng, L. Wu, X. B. Li and T. Zhang, *ACS Catal.*, 2023, **13**, 1089-1096.
- (13) S. Li, R. Ma, S. Xu, T. Zheng, G. Fu, Y. Wu, Z. Liao, Y. Kuang, Y. Hou, D. Wang, P. S. Petkov, K. Simeonova, X. Feng, Z. X. Wu, B. Li and T. Zhang, *J. Am. Chem. Soc.*, 2022, **144**, 13953-13960.
